# Supplementary material
Source: PubMed Central journal article supplement (PMC3075095)

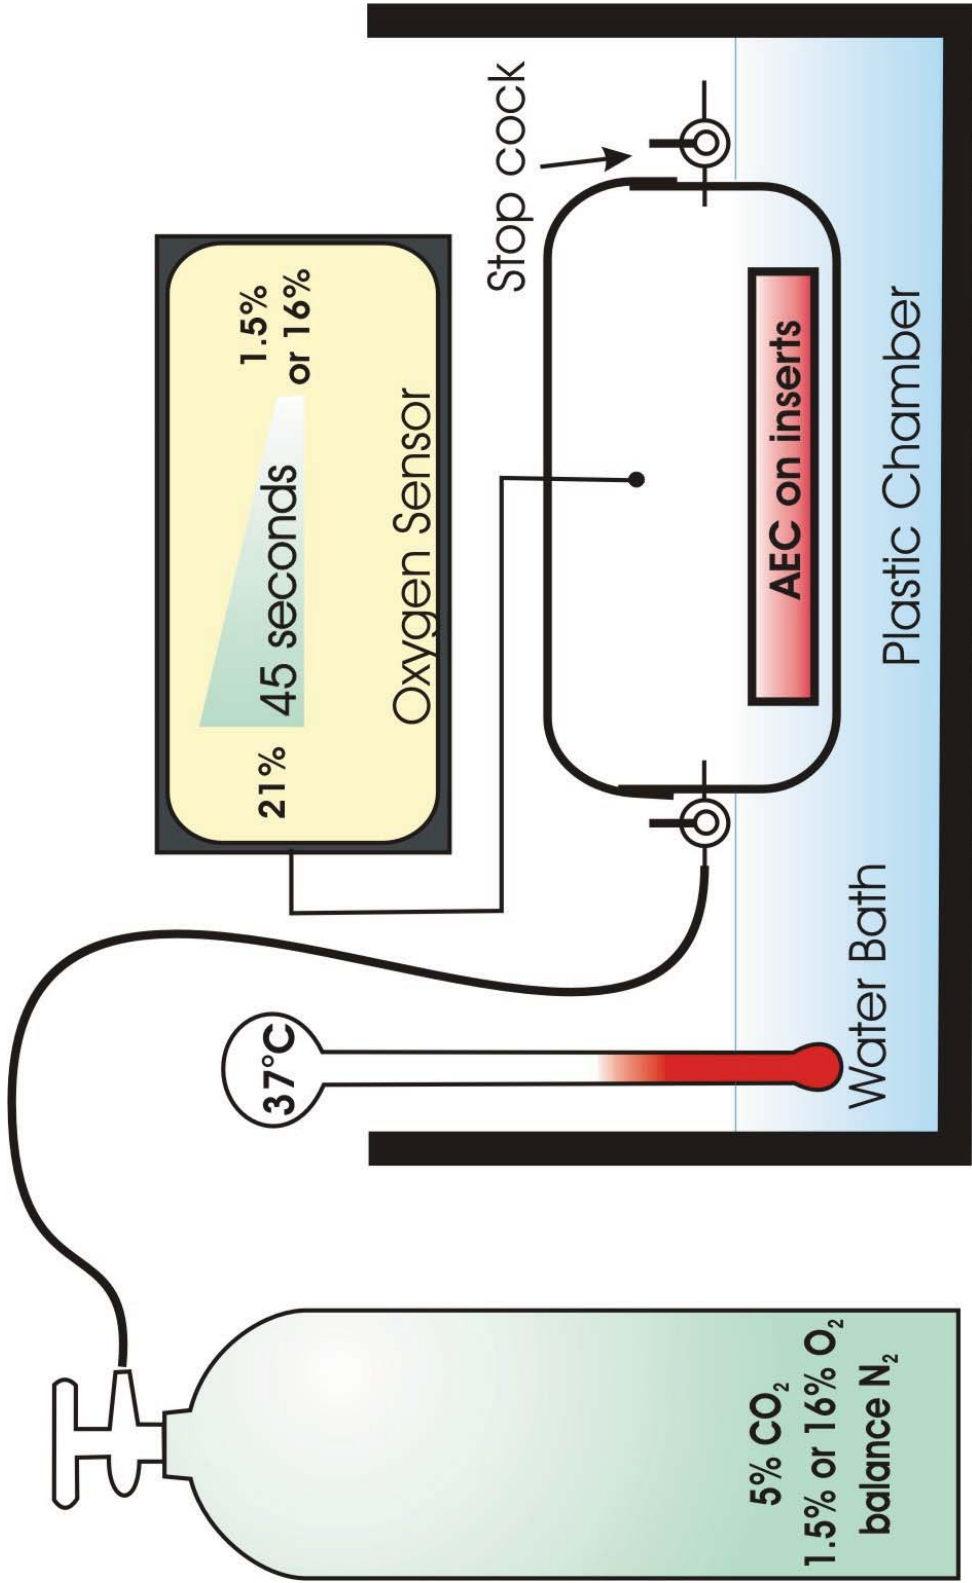

Supplement: supp_00109.2010_figS1.pdf [file supp_00109.2010_figS1.pdf]

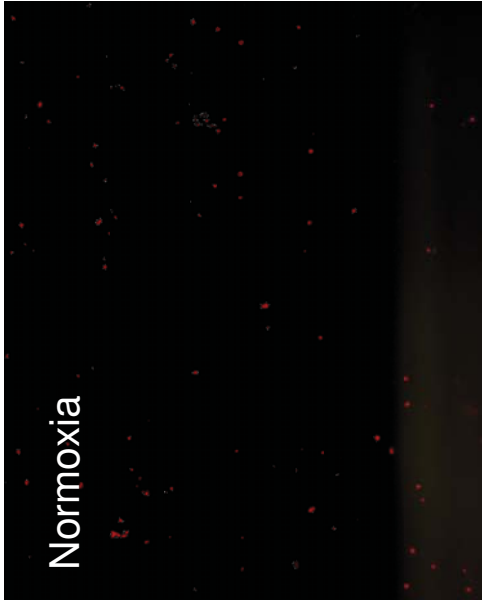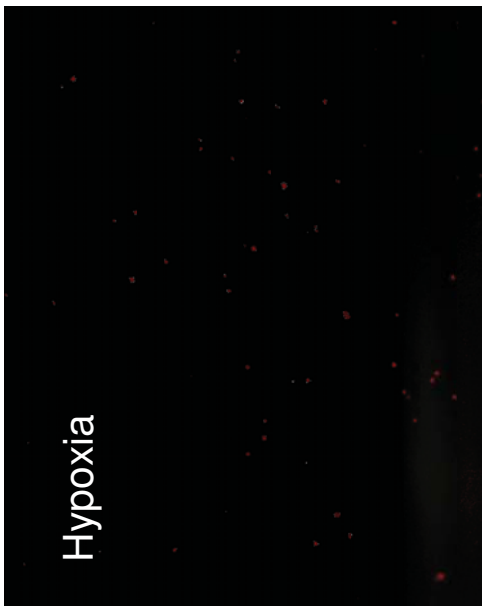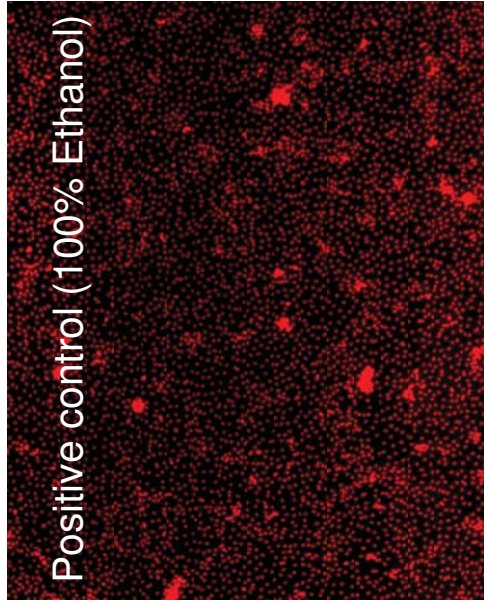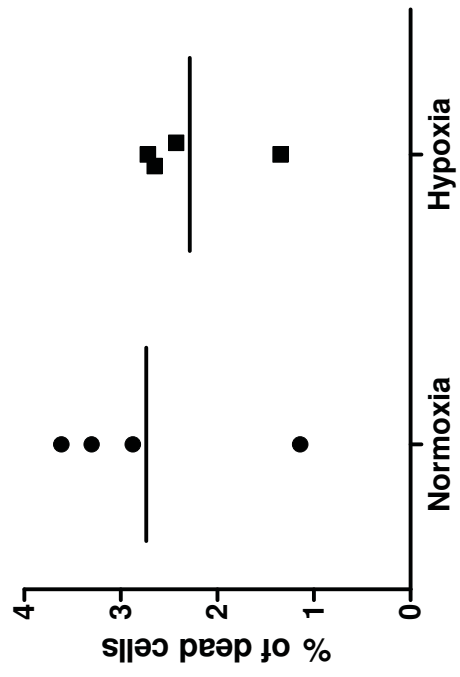

Supplement: supp_00109.2010_figS2.pdf [file supp_00109.2010_figS2.pdf]

**A**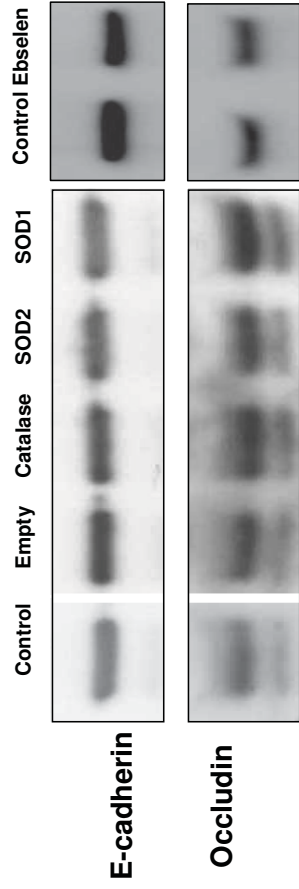**C**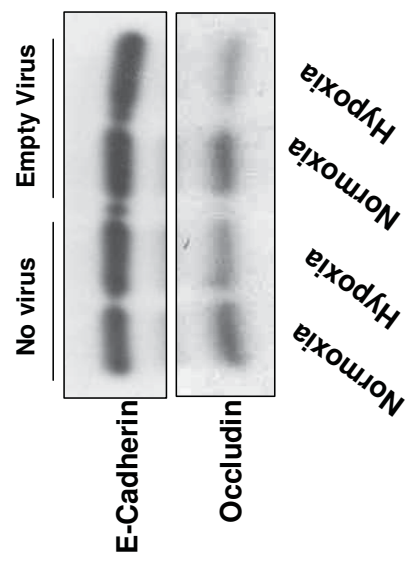**B**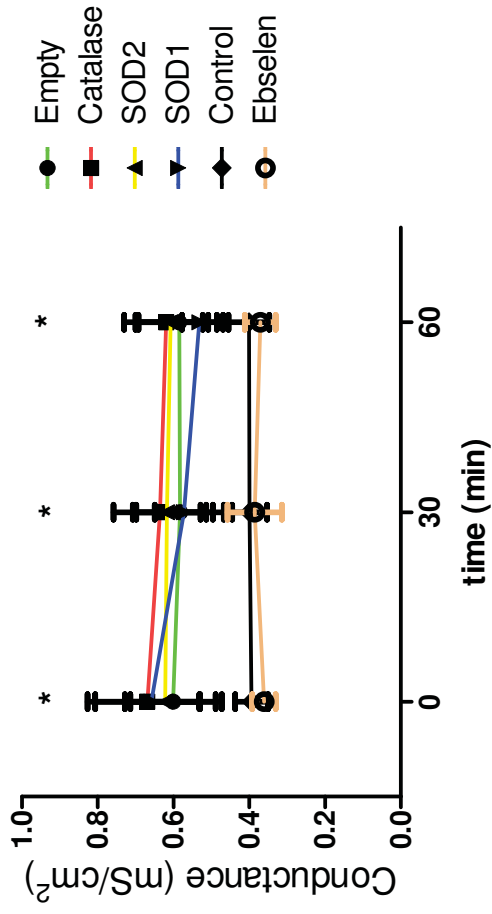

Supplement: supp_00109.2010_figS3.pdf [file supp_00109.2010_figS3.pdf]

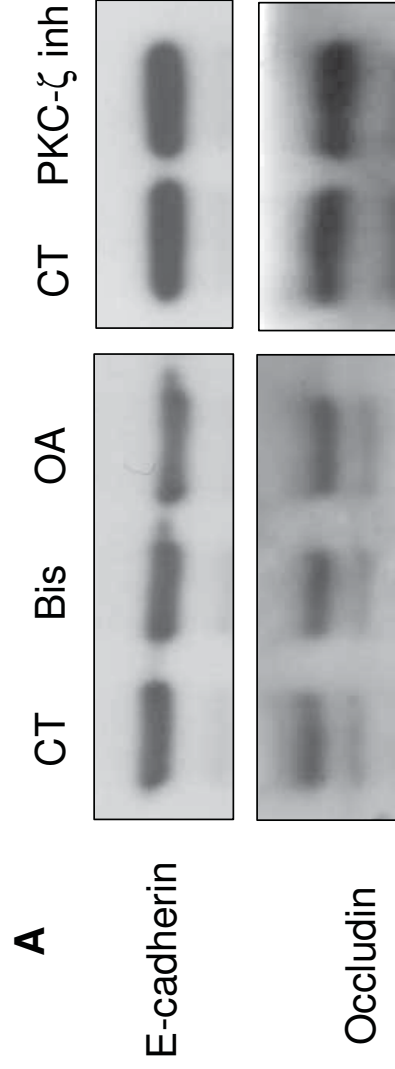

**B**

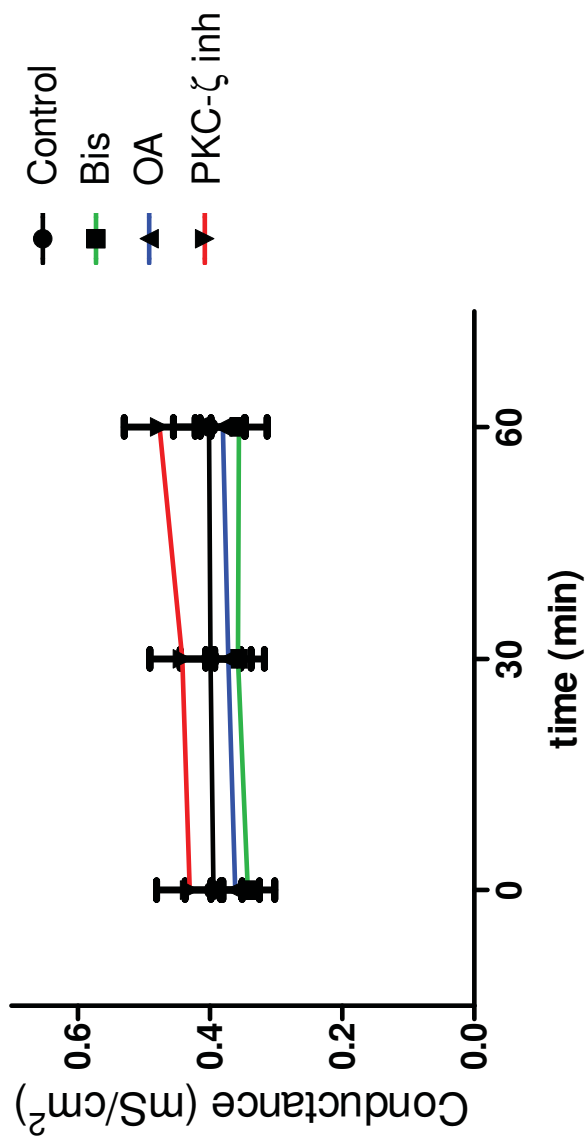

Supplement: supp_00109.2010_figS4.pdf [file supp_00109.2010_figS4.pdf]

30 minutes

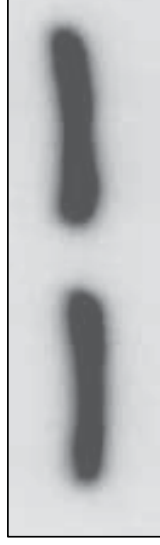

$\beta$ -Actin

60 minutes

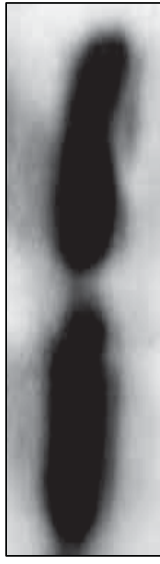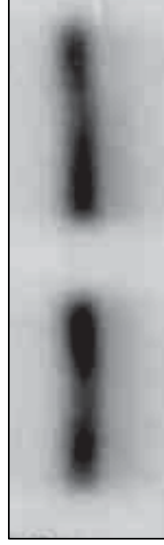

Occludin

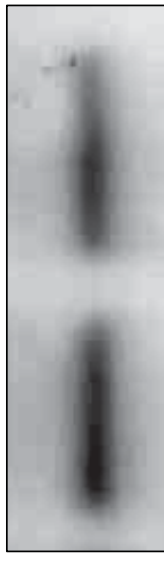

Normoxia

Hypoxia

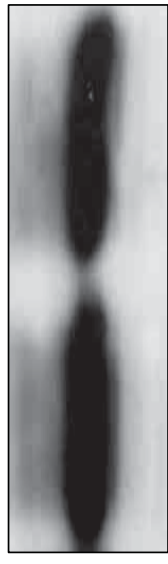

PP2A

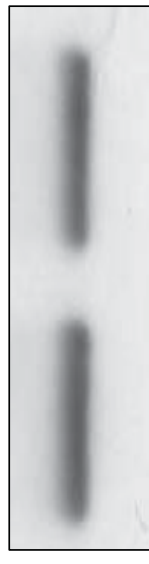

PKC- $\zeta$

Normoxia

Hypoxia

Supplement: supp_00109.2010_figS5.pdf [file supp_00109.2010_figS5.pdf]
